# Supplementary figures and images for: Determination of the Copy Number of Porcine Endogenous Retroviruses (PERV) in Auckland Island Pigs Repeatedly Used for Clinical Xenotransplantation and Elimination of PERV-C
Source: MDPI journal article supplement (doi:10.3390/microorganisms12010098), 2024-01-03

**Figure S1.** Standard curve of the real-time PCR for the detection of PERV-C.

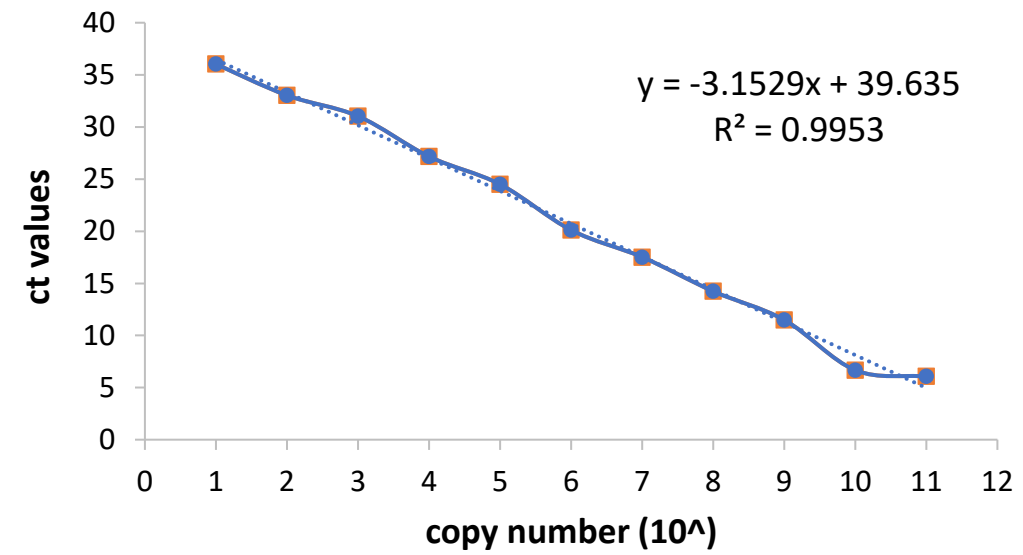

Supplement: s1 [file s1]
